# Supplementary material for: Overexpression of TP53INP2 Promotes Apoptosis in Clear Cell Renal Cell Cancer via Caspase-8/TRAF6 Signaling Pathway
Source: Hindawi journal article supplement (doi:10.1155/2022/1260423), 2022-05-14

A

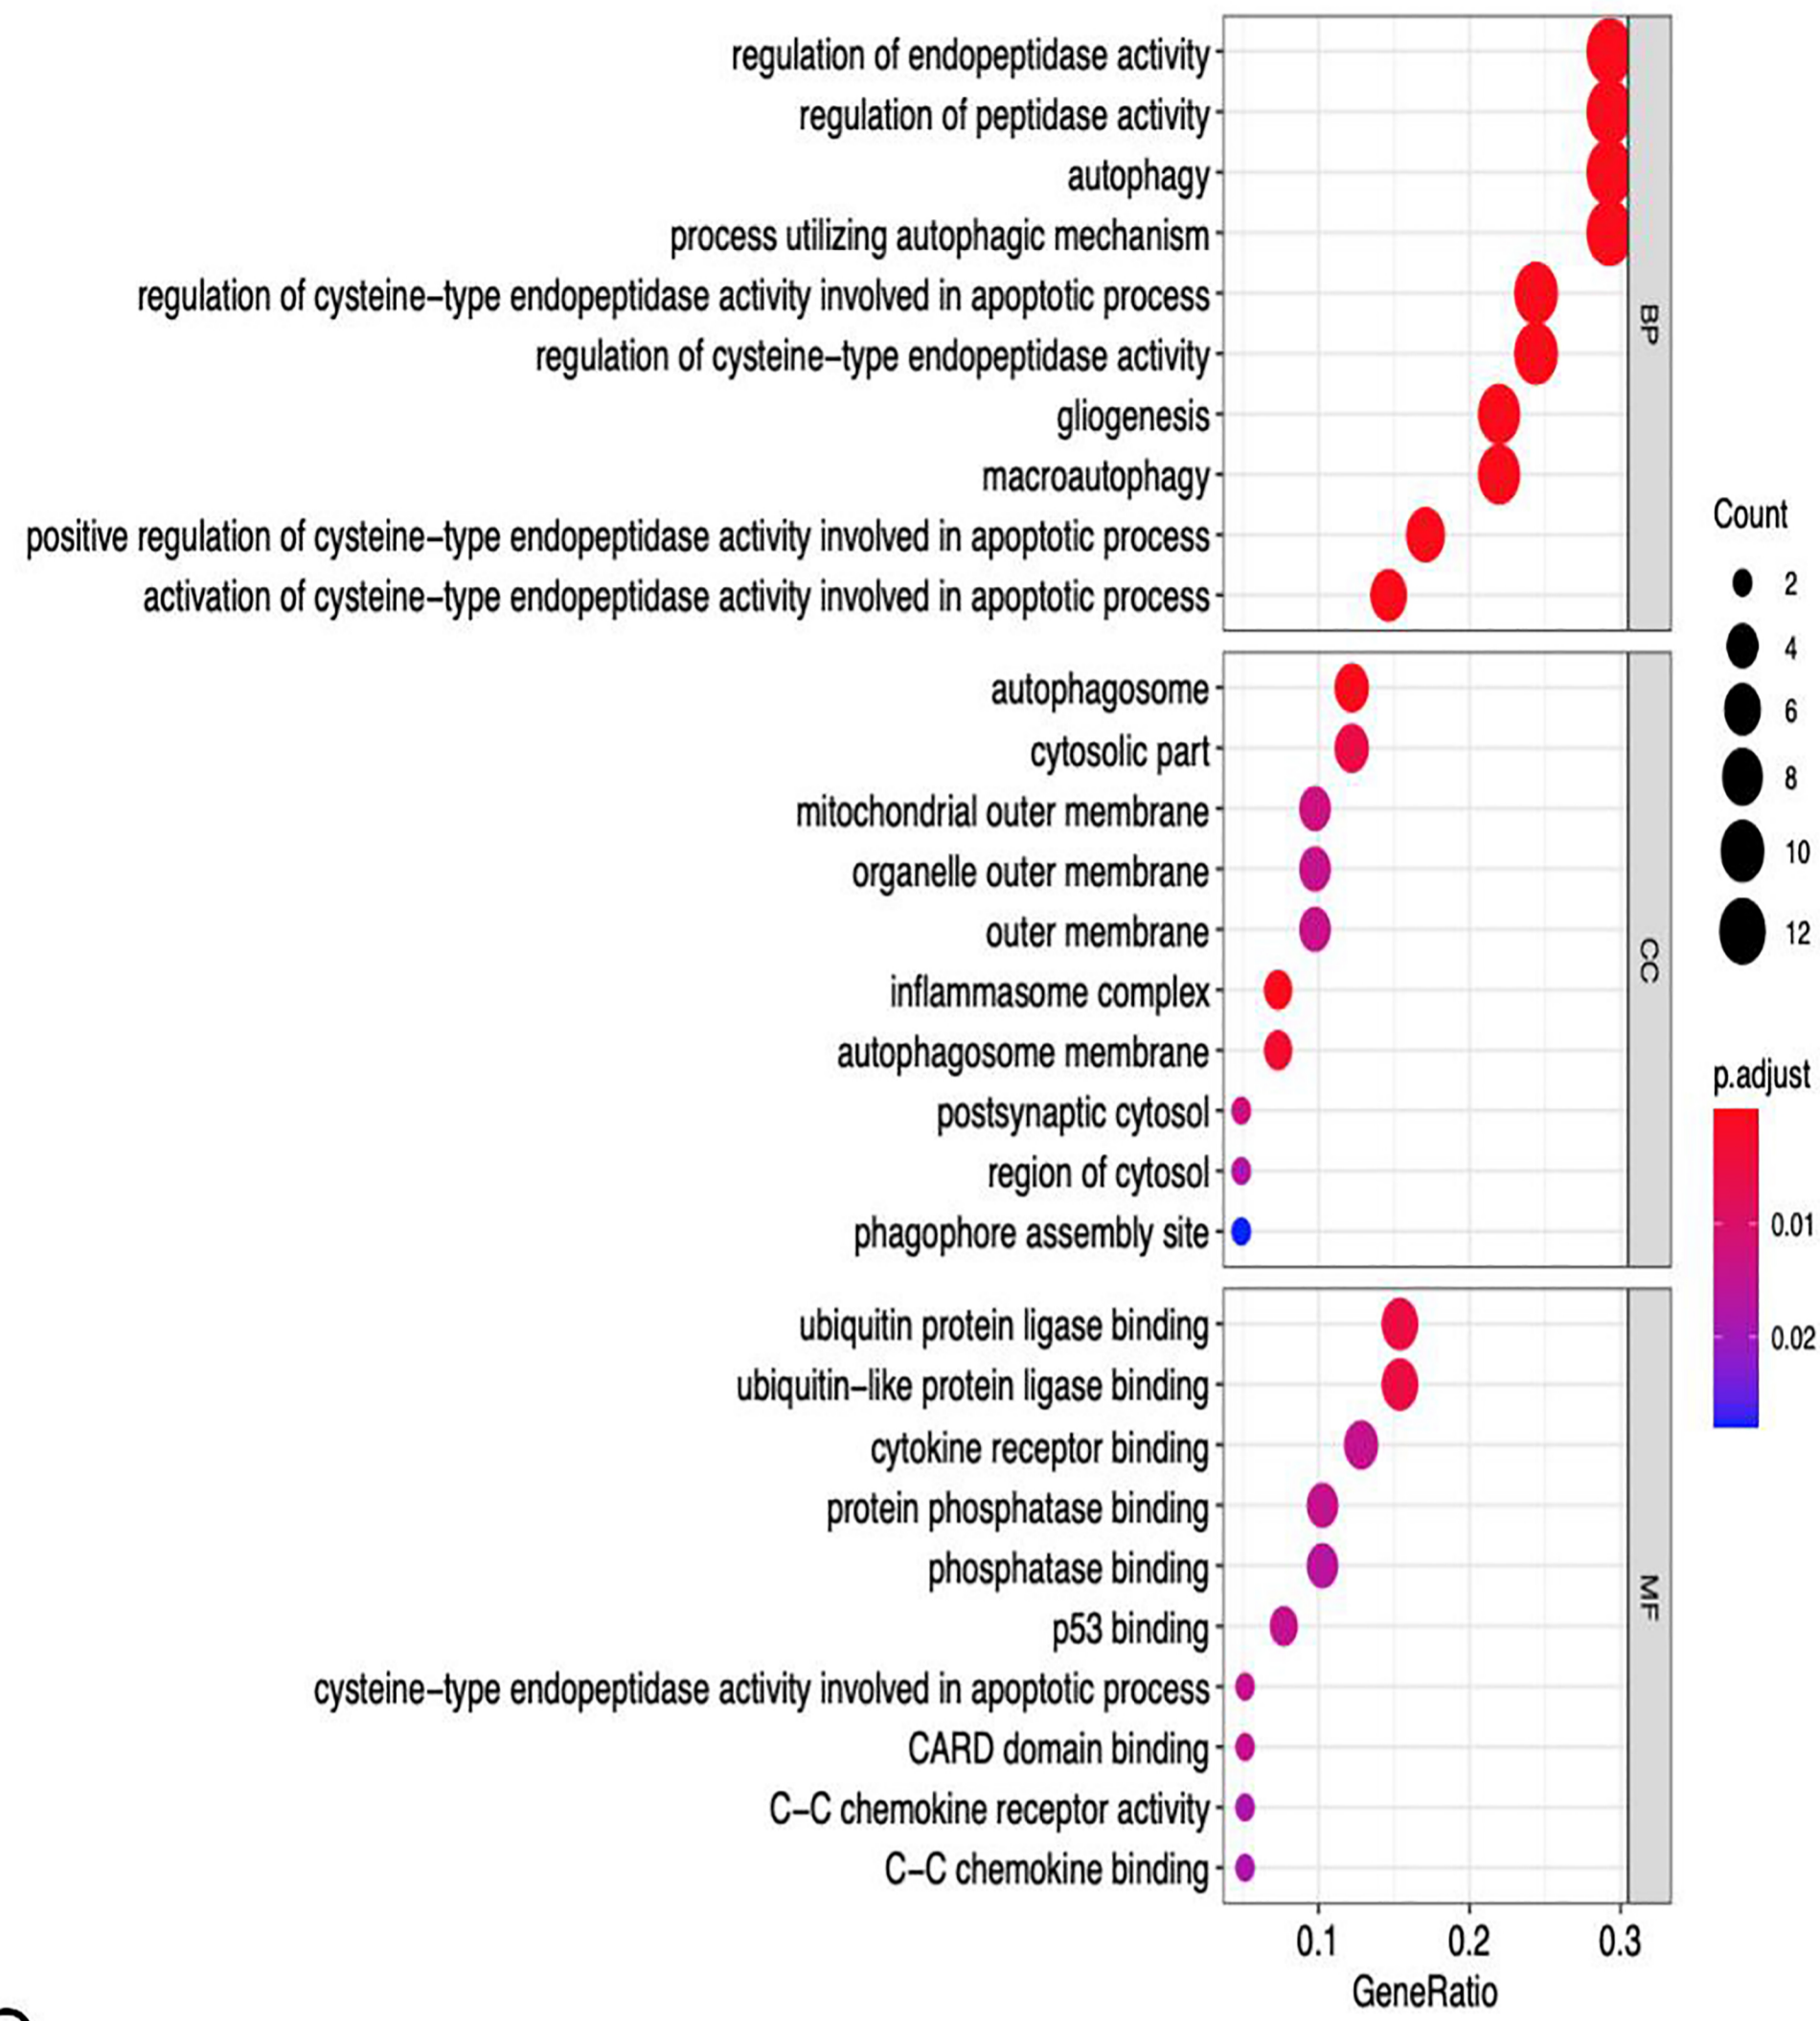

B

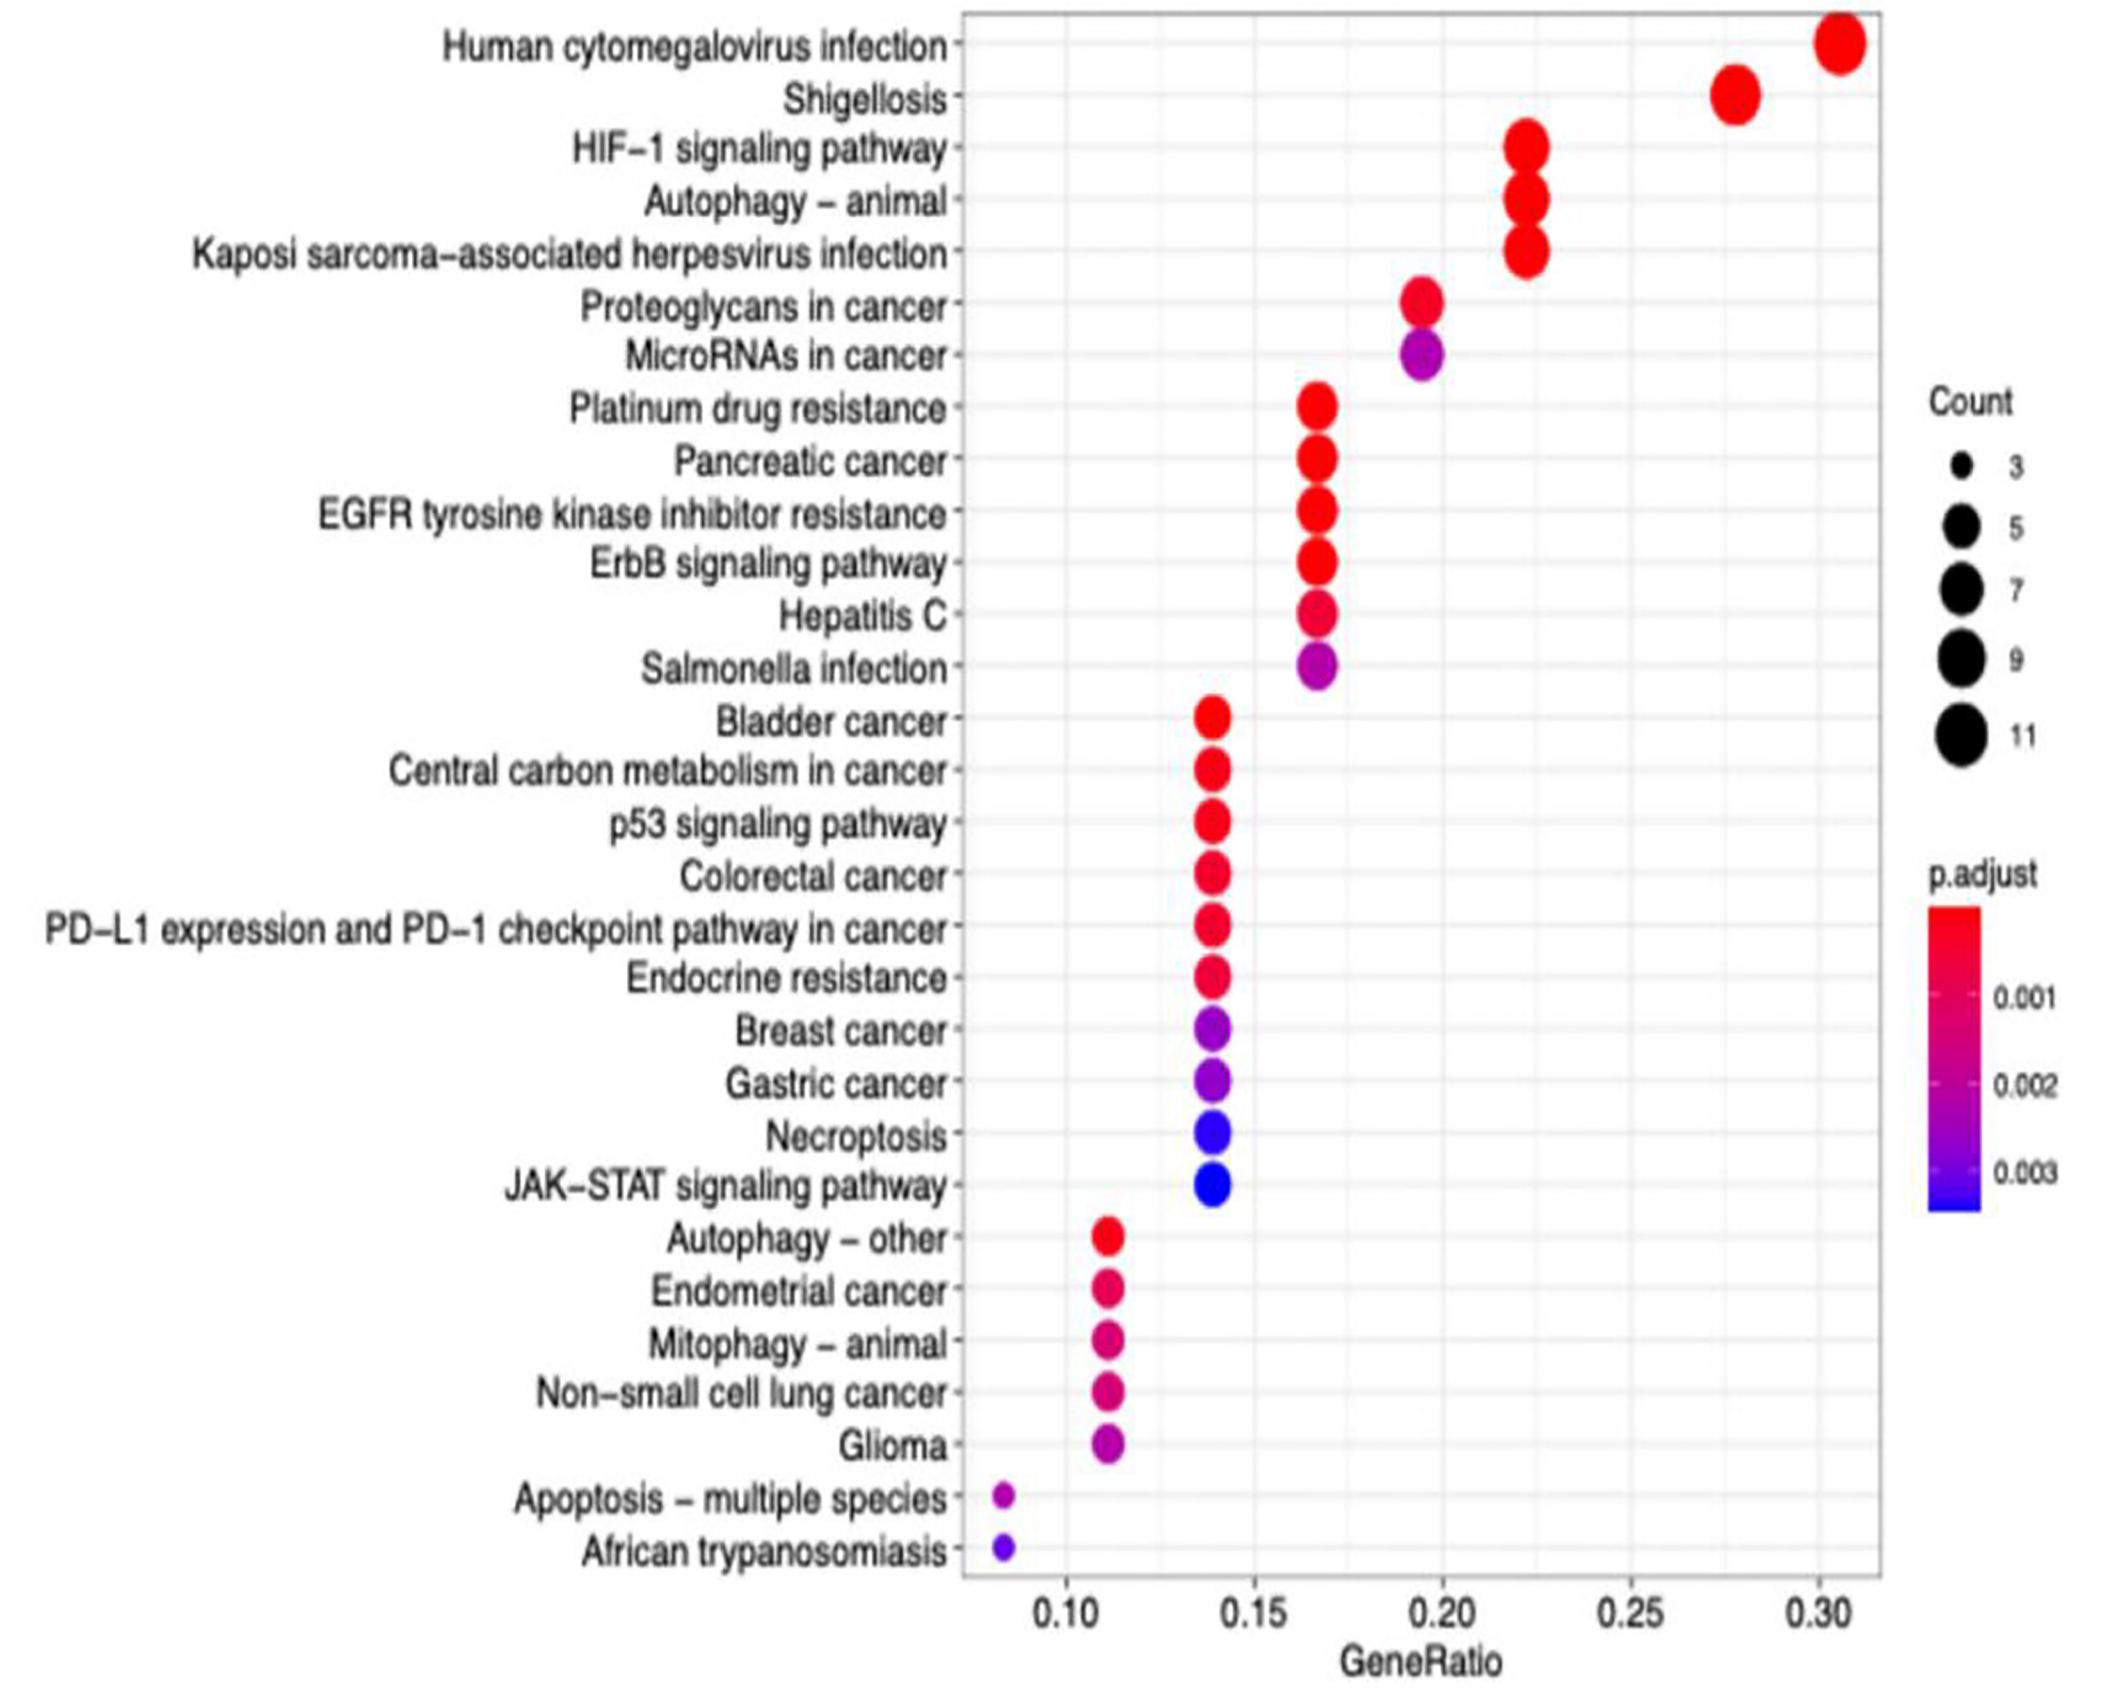

C

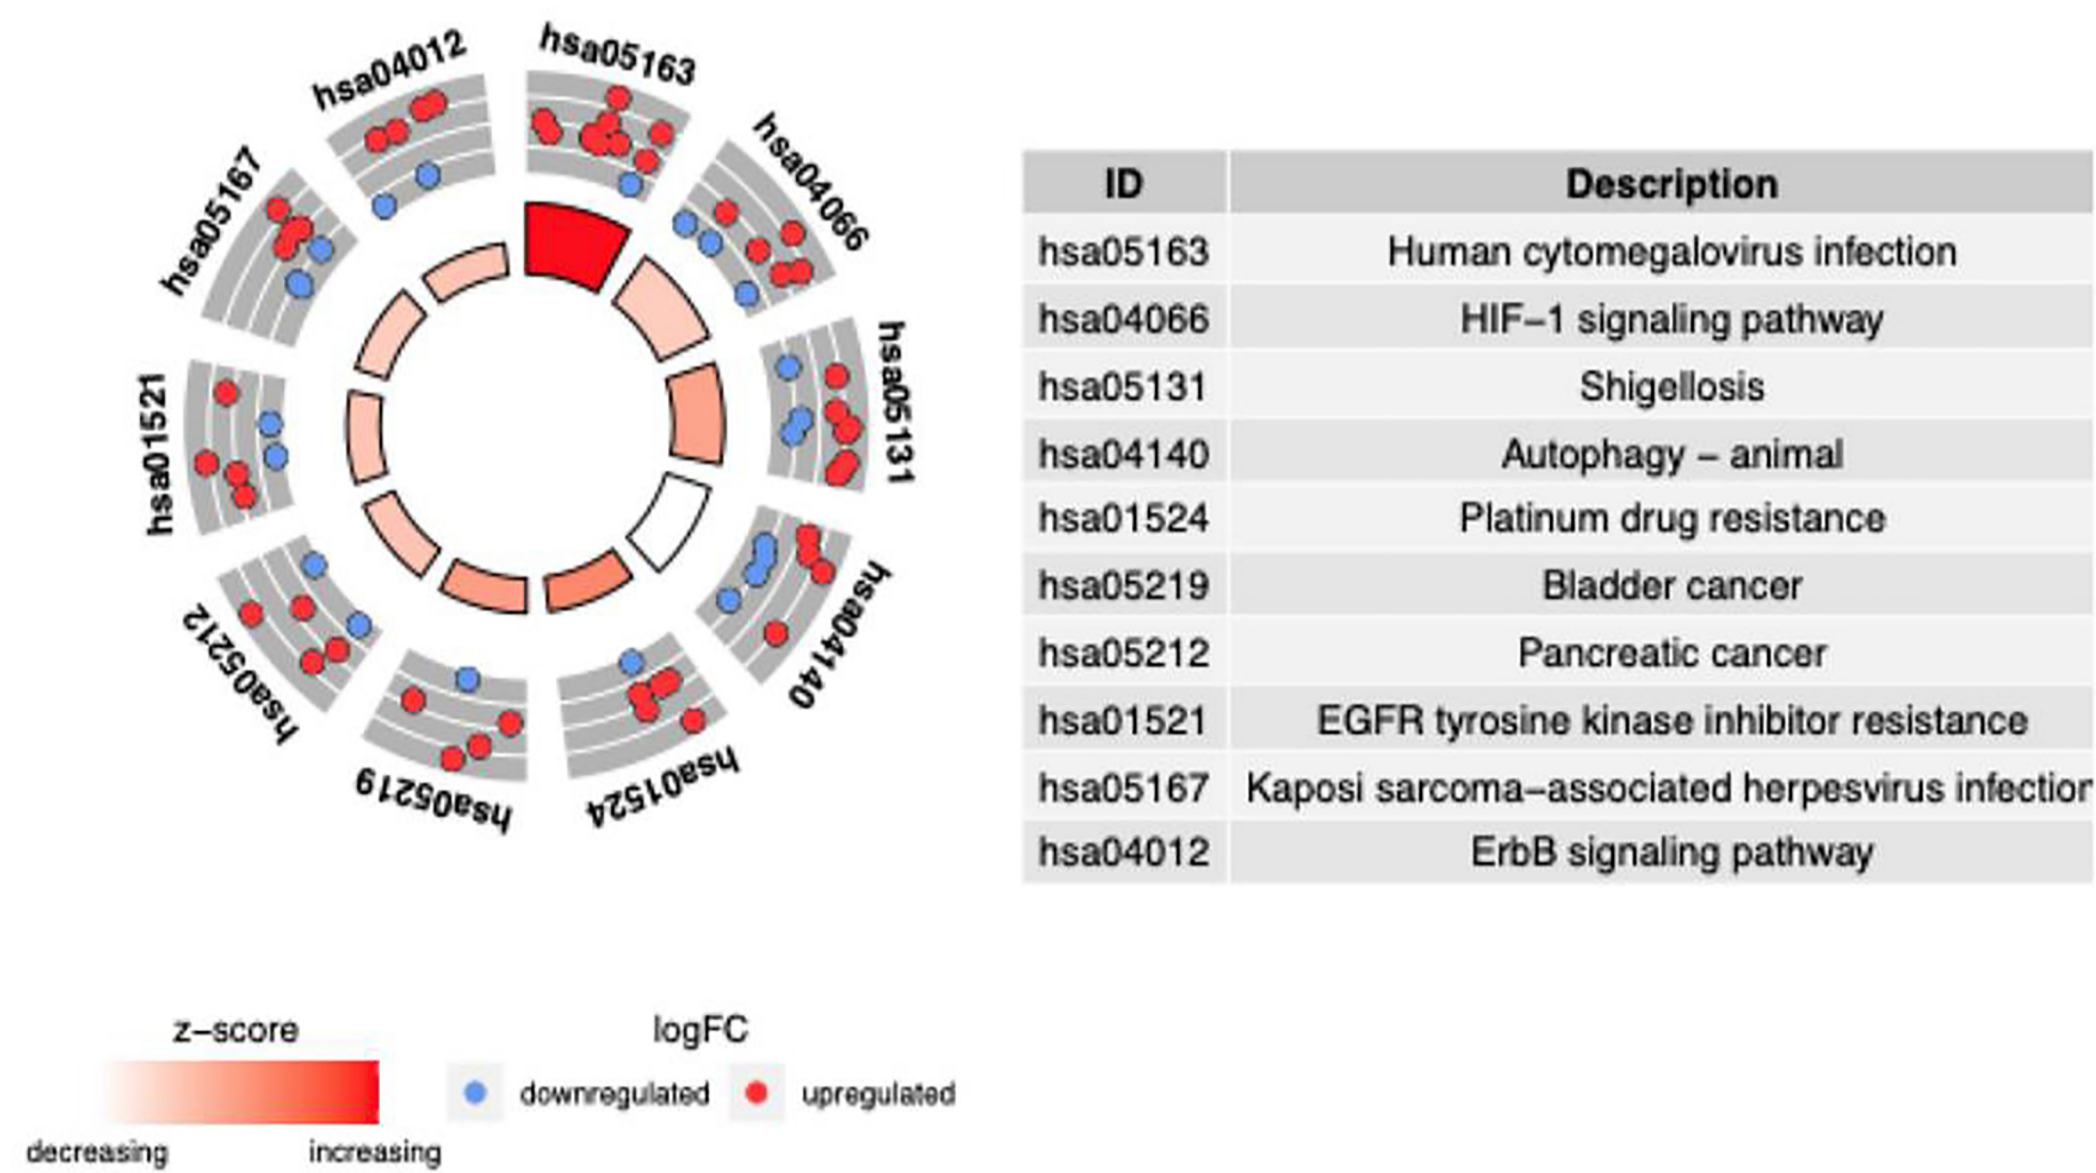

D

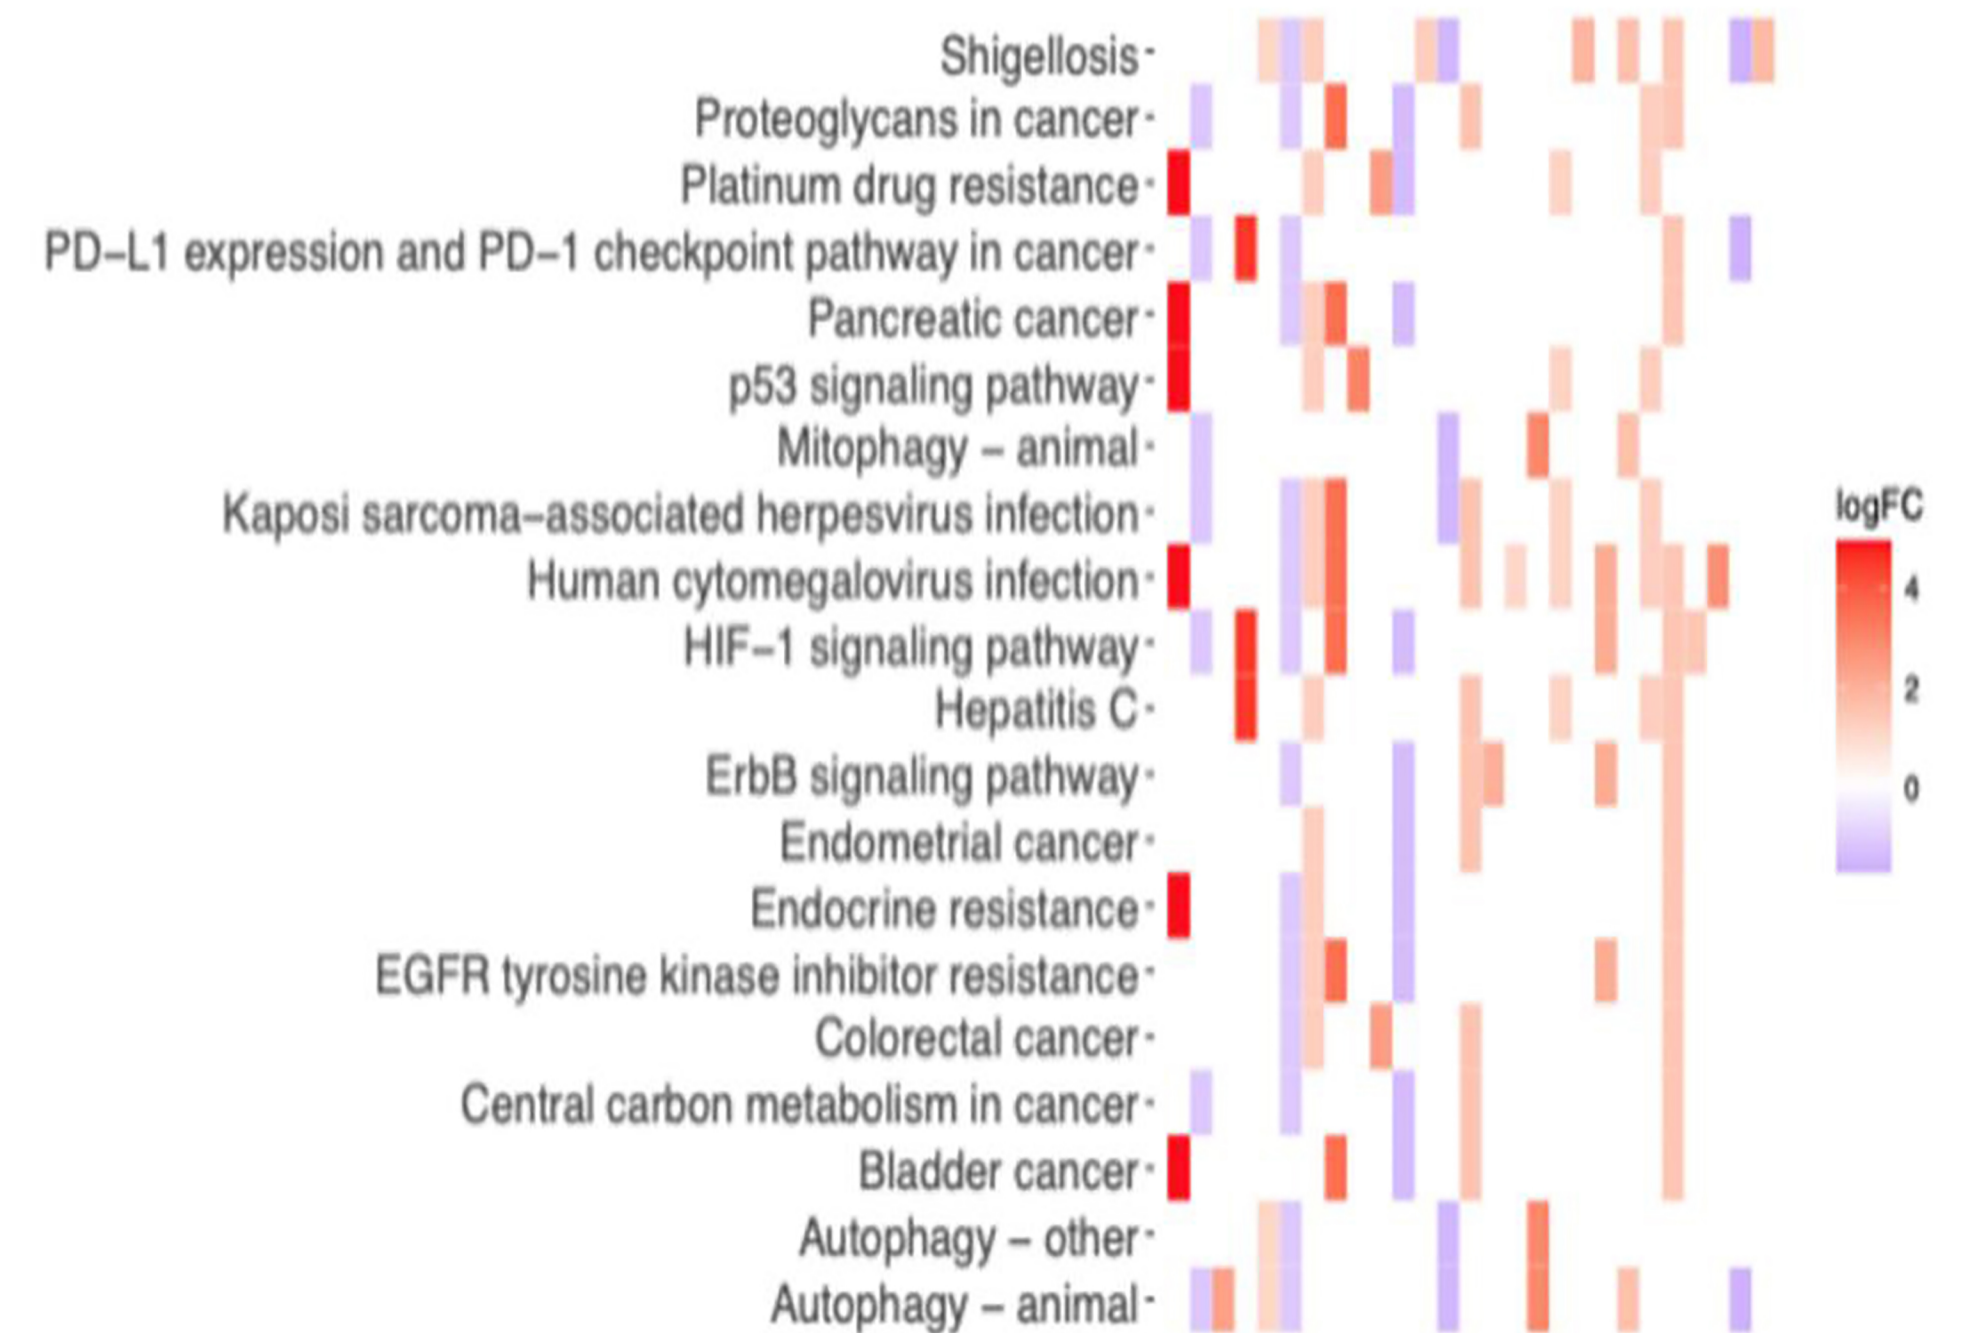

Supplement: f1 [file 1260423.f1.pdf]
