# Supplementary material for: Overexpression of TP53INP2 Promotes Apoptosis in Clear Cell Renal Cell Cancer via Caspase-8/TRAF6 Signaling Pathway
Source: Hindawi journal article supplement (doi:10.1155/2022/1260423), 2022-05-14

**BID (p<0.001)**

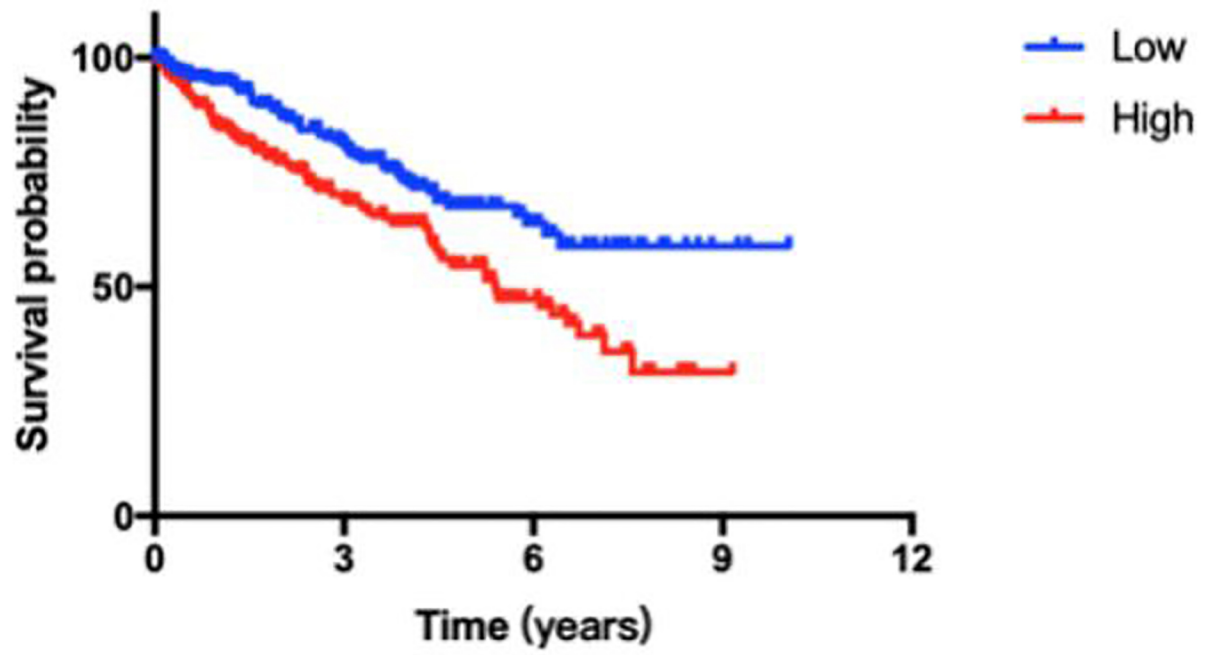

**ATG4B (p<0.001)**

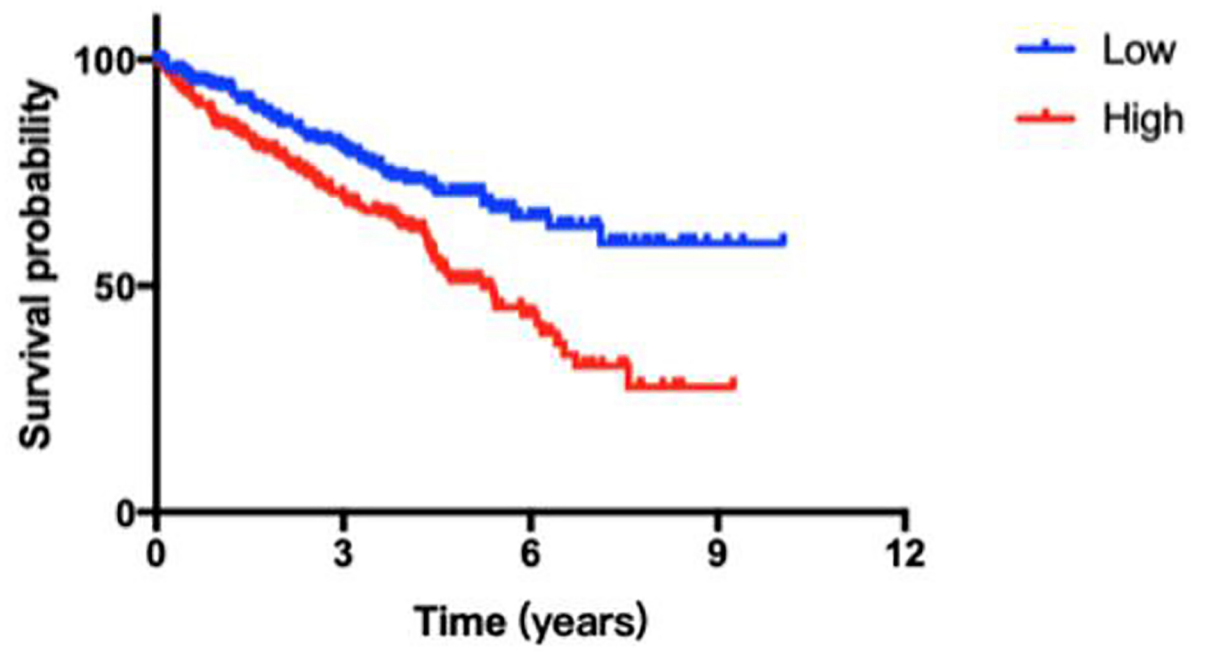

**CASP4 (p=0.001)**

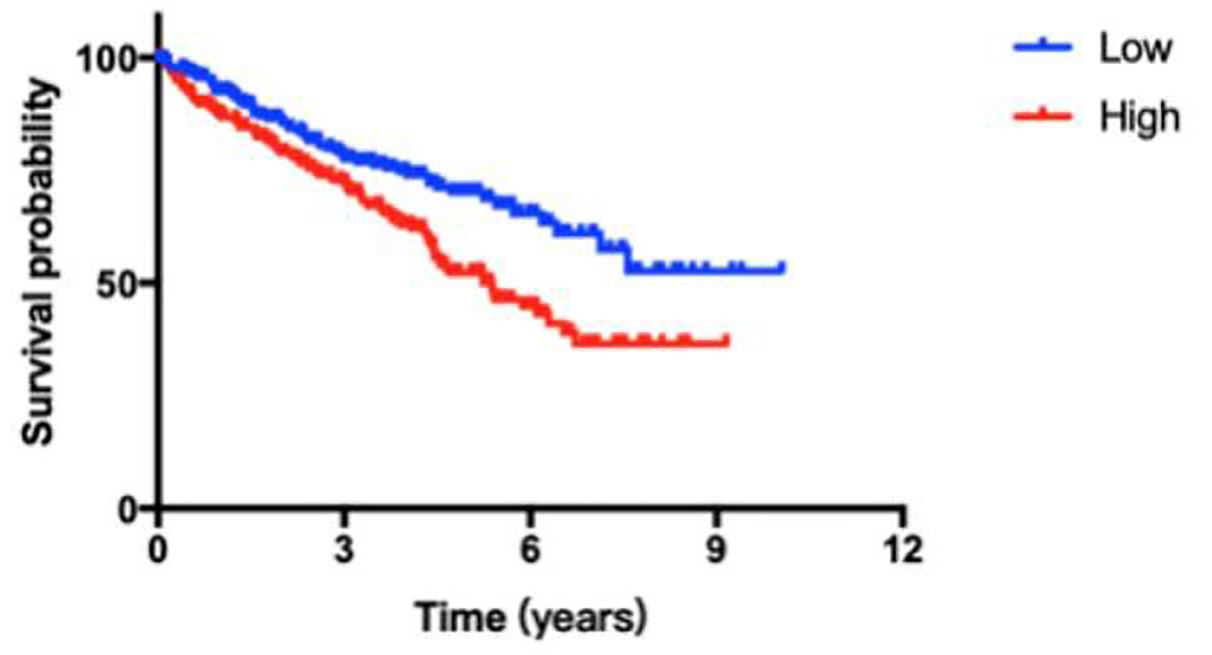

**CAPN10 (p=0.021)**

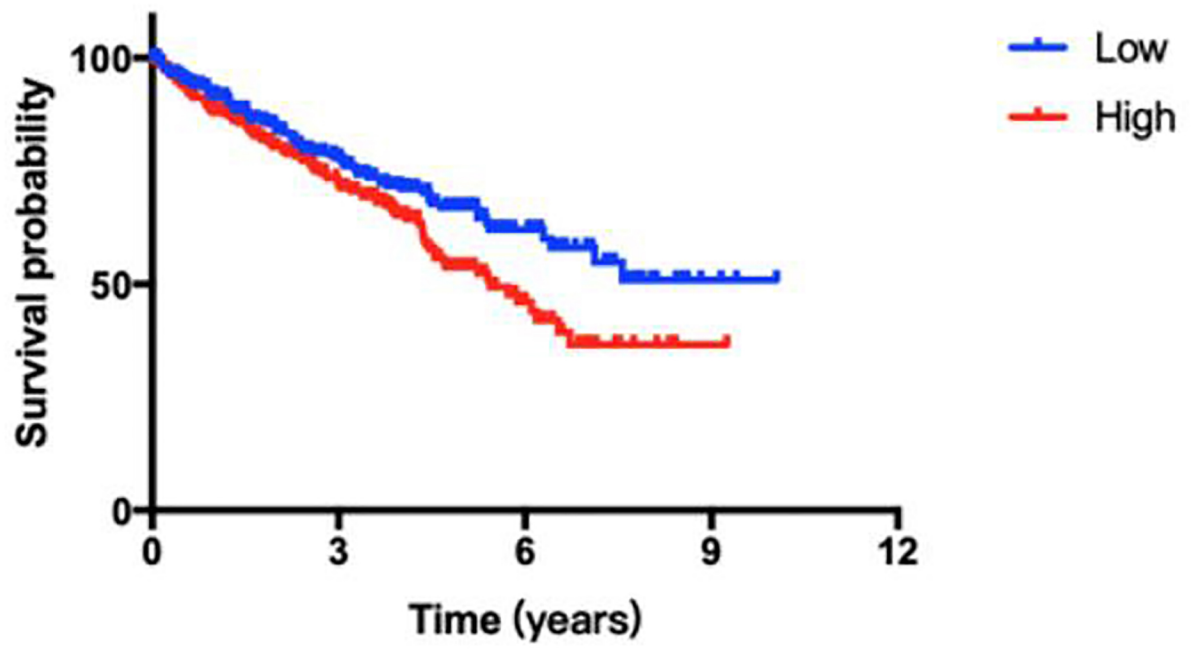

**ULK1 (p<0.001)**

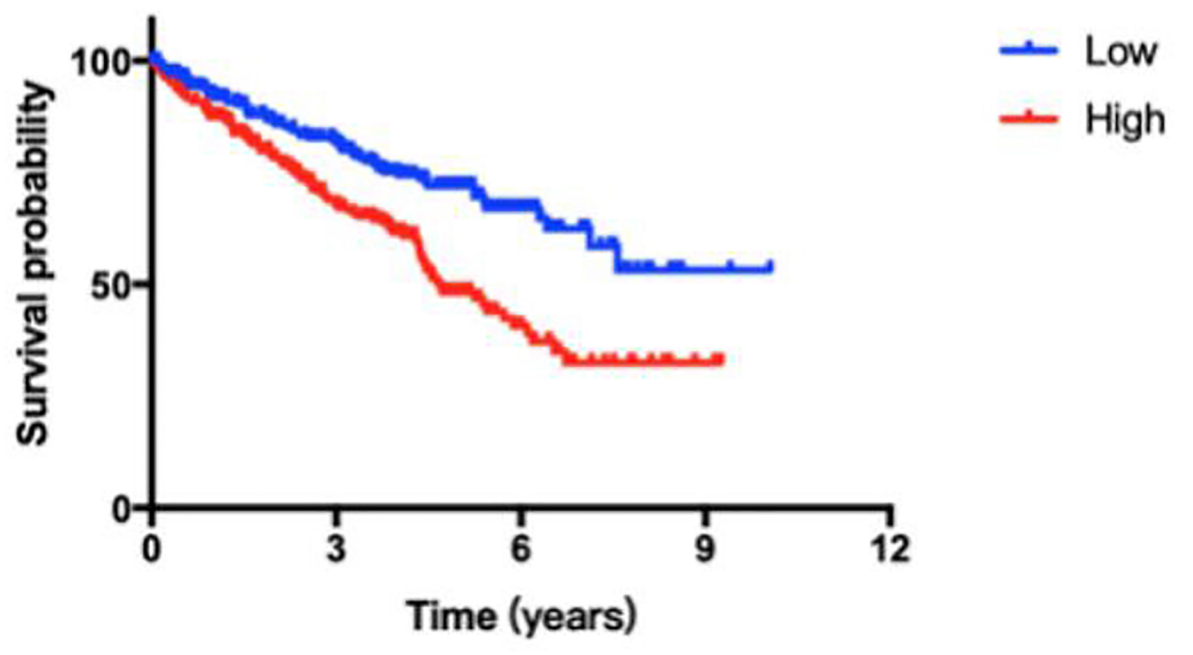

Supplement: f2 [file 1260423.f2.pdf]
