# Supplementary material for: Overexpression of TP53INP2 Promotes Apoptosis in Clear Cell Renal Cell Cancer via Caspase-8/TRAF6 Signaling Pathway
Source: Hindawi journal article supplement (doi:10.1155/2022/1260423), 2022-05-14

**NPC1 (p=0.207)**

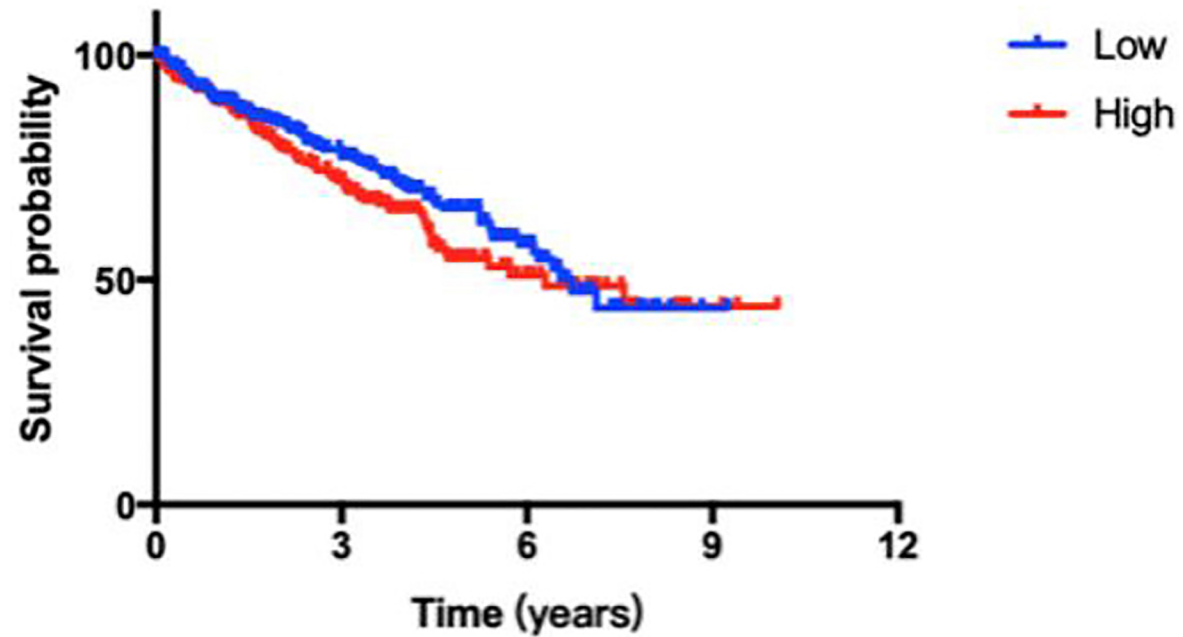

**CDKN2A (p=0.053)**

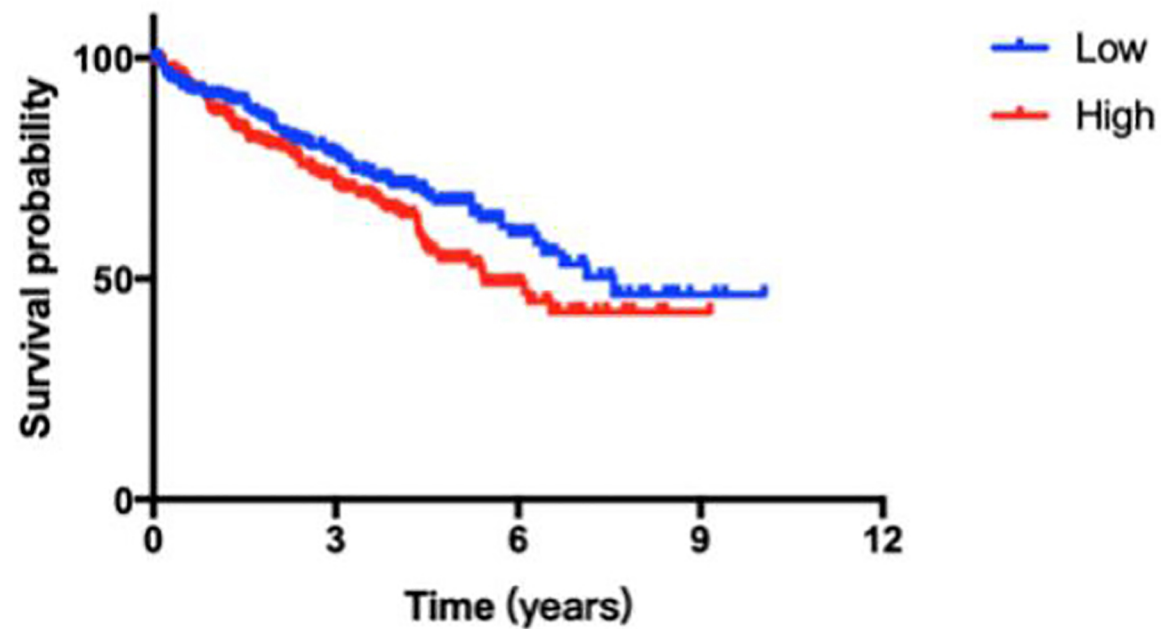

Supplement: f4 [file 1260423.f4.pdf]
